# Supplementary material for: Lactobacillus-dominance and rapid stabilization of vaginal microbiota in combined oral contraceptive pill users examined through a longitudinal cohort study with frequent vaginal sampling over two years
Source: PubMed Central journal article supplement (PMC9792759; doi:10.1016/j.ebiom.2022.104407), 2022-12-16
Supplement: mmc4.pdf [file mmc4.pdf]

## HCL Study – Enrollment Visit Eligibility Form

|                                                           |                              |
|-----------------------------------------------------------|------------------------------|
| Date:  __   __    /  __   __    /  __   __   <br>mm dd yy | Site #:  __   __   __        |
| ENRL #:  _E_   __   __   __                               | Visit ID:  __   __   __   __ |
|                                                           | Staff ID:  __   __           |

**Fill in all with which you agree.**

1.  She is 16-35 years of age
2.  She can speak English
3.  She is **not** pregnant
4.  She has **not** had a hysterectomy
5.  She does **not** have an intrauterine device implantation
6.  She does **not** have any of the following conditions, which suppress her immune system. (If she **does**, fill in all that applies.)
  - a.  Diabetes
  - b.  HIV
  - c.  Other, specify \_\_\_\_\_
7.  She is **not** taking any medications, which suppress her immune system
8.  She does **not** have any of the following conditions, which alter her sex hormones. (If she **does**, fill in all that applies.)
  - a.  Polycystic ovarian syndrome
  - b.  Premature ovarian failure
  - c.  Other, specify \_\_\_\_\_
9.  She has **not** had or does **not** have any of the following conditions, which contraindicate HC use. (If she **does**, fill in all that applies.)

- a.  Thromboembolism
  - b.  Estrogen-dependent tumor
  - c.  Liver disease
  - d.  Abnormal uterine bleeding
  - e.  Other, specify \_\_\_\_\_
10.  She is not currently on birth control.
    - She is newly starting birth control.
    - She is already on birth control, and she has indicated that she could discontinue it within the next two years.

**If you filled in items 1-10, enroll patient and complete items 11-15.**

11.  She signed the informed consent form while being observed by a witness.
12.  The witness signed the informed consent form.
13.  One copy of the signed informed consent form was given to her and another was retained in her study record.
14. Date signed informed consent:  
|\_\_| |\_\_| | / |\_\_| |\_\_| | / |\_\_| |\_\_| |
15. Assigned patient enrollment number:  
|\_E\_| |\_\_| |\_\_| |\_\_| |

|                                               |             |
|-----------------------------------------------|-------------|
| Initials of person completing the form: _____ | Date: _____ |
|-----------------------------------------------|-------------|

**HCL Study – Enrollment Visit  
Demographics Questionnaire**

|                                                                                                                                                                                |                        |
|--------------------------------------------------------------------------------------------------------------------------------------------------------------------------------|------------------------|
| Date:  __ __  /  __ __  /  __ __ <br><small style="margin-left: 100px;">mm</small> <small style="margin-left: 100px;">dd</small> <small style="margin-left: 100px;">yy</small> | Site #:  __ __ __      |
| ENRL #:  _E_ __ __ __                                                                                                                                                          | Visit ID:  __ __ __ __ |
| Staff ID:  __ __                                                                                                                                                               |                        |

1. **What is your date of birth?** ..... |\_\_|\_\_| / |\_\_|\_\_| / |\_\_|\_\_| (mm/dd/yy)
2. **How old are you?** ..... |\_\_|\_\_| yr

Fill in all that applies.

**3. Which of the following describes your race or ethnicity?**

- |                                              |                                                           |                                 |
|----------------------------------------------|-----------------------------------------------------------|---------------------------------|
| <input type="radio"/> Asian/Pacific Islander | <input type="radio"/> Native American/<br>American Indian | <input type="radio"/> Other     |
| <input type="radio"/> Black/African American | <input type="radio"/> White/Caucasian                     | <input type="radio"/> No answer |
| <input type="radio"/> Hispanic/Latina        |                                                           |                                 |

If "Other," specify \_\_\_\_\_

**4. How much school have you completed?**

- |                                                                             |                                                                        |                                            |
|-----------------------------------------------------------------------------|------------------------------------------------------------------------|--------------------------------------------|
| <input type="radio"/> None                                                  | <input type="radio"/> Some high school                                 | <input type="radio"/> College (4 years)    |
| <input type="radio"/> Some elementary school                                | <input type="radio"/> High school (9 <sup>th</sup> -12 <sup>th</sup> ) | <input type="radio"/> Some graduate school |
| <input type="radio"/> Elementary school (1 <sup>st</sup> -5 <sup>th</sup> ) | <input type="radio"/> Some community college                           | <input type="radio"/> Graduate school      |
| <input type="radio"/> Some middle school                                    | <input type="radio"/> Community college (2 years)                      | <input type="radio"/> No answer            |
| <input type="radio"/> Middle school (6 <sup>th</sup> -8 <sup>th</sup> )     | <input type="radio"/> Some college                                     |                                            |

**5. During the last year, where did you get money for food, clothing and shelter?**

- |                                         |                                                                                                                    |                                 |
|-----------------------------------------|--------------------------------------------------------------------------------------------------------------------|---------------------------------|
| <input type="radio"/> Job               | <input type="radio"/> Welfare payments, such as<br>AFDC or SSI (WIC, Food<br>Stamps, Free School<br>lunches, etc.) | <input type="radio"/> Other     |
| <input type="radio"/> Own business      | <input type="radio"/> Unemployment benefits                                                                        | <input type="radio"/> No answer |
| <input type="radio"/> Significant other |                                                                                                                    |                                 |
| <input type="radio"/> Family or friends |                                                                                                                    |                                 |
| <input type="radio"/> Alimony payments  |                                                                                                                    |                                 |

If "Other," specify \_\_\_\_\_

**6. What is your total household income from all sources per month?**

- |                                     |                                      |                                 |
|-------------------------------------|--------------------------------------|---------------------------------|
| <input type="radio"/> \$500 or less | <input type="radio"/> \$801 – 3000   | <input type="radio"/> No answer |
| <input type="radio"/> \$501-800     | <input type="radio"/> \$3001 or more |                                 |

**7. What is your marital status?**

- |                                     |                                |                                 |
|-------------------------------------|--------------------------------|---------------------------------|
| <input type="radio"/> Never married | <input type="radio"/> Divorced | <input type="radio"/> No answer |
| <input type="radio"/> Married       | <input type="radio"/> Widowed  |                                 |
| <input type="radio"/> Separated     | <input type="radio"/> Other    |                                 |

If "Other," specify \_\_\_\_\_

|                                               |             |
|-----------------------------------------------|-------------|
| Initials of person completing the form: _____ | Date: _____ |
|-----------------------------------------------|-------------|

**HCL Study – Enrollment Visit  
General Health & Care Questionnaire**

|                                                                                                                                                                                                                                                                                                  |                              |
|--------------------------------------------------------------------------------------------------------------------------------------------------------------------------------------------------------------------------------------------------------------------------------------------------|------------------------------|
| Date:  __   __  /  __   __  /  __   __ <br><small style="display: inline-block; width: 20px; text-align: center;">mm</small> <small style="display: inline-block; width: 20px; text-align: center;">dd</small> <small style="display: inline-block; width: 20px; text-align: center;">yy</small> | Site #:  __   __   __        |
| ENRL #:  _E_   __   __   __                                                                                                                                                                                                                                                                      | Visit ID:  __   __   __   __ |
| Staff ID:  __   __                                                                                                                                                                                                                                                                               |                              |

1. Are you in good general health?  Yes (skip to item 2)       No
  - a. If "No", briefly describe \_\_\_\_\_
  
2. Some people visit a doctor just for a checkup. How long ago was your last checkup?
 

|                                                 |                                                                   |
|-------------------------------------------------|-------------------------------------------------------------------|
| <input type="radio"/> Less than 1 year ago      | <input type="radio"/> I do not visit a doctor just for a checkup. |
| <input type="radio"/> Between 1 and 3 years ago | <input type="radio"/> No answer                                   |
| <input type="radio"/> More than 3 years ago     |                                                                   |
  
3. Do you have any allergies?  Yes       No (skip to item 4)
  - a. If "Yes", specify \_\_\_\_\_
  
4. Do you know you have any of the following? (Fill in all that applies.)
 

|                                                         |                                                |               |
|---------------------------------------------------------|------------------------------------------------|---------------|
| <input type="radio"/> Diabetes                          | <input type="radio"/> Gastrointestinal disease | Specify _____ |
| <input type="radio"/> Hypertension                      | <input type="radio"/> Skin disease             | Specify _____ |
| <input type="radio"/> Heart disease      Specify _____  | <input type="radio"/> Immunological disorder   | Specify _____ |
| <input type="radio"/> Lung disease      Specify _____   | <input type="radio"/> Rheumatic disorder       | Specify _____ |
| <input type="radio"/> Liver disease      Specify _____  | <input type="radio"/> Other                    | Specify _____ |
| <input type="radio"/> Kidney disease      Specify _____ | <input type="radio"/> None                     |               |
|                                                         | <input type="radio"/> No answer                |               |
  
5. Do you take any vitamins or other supplements?  Yes       No (skip to item 6)
  - a. If "Yes", specify \_\_\_\_\_
  
6. Do you take any prescription medications?  Yes       No (skip to item 7)
  - a. If "Yes", please list all your medications here and provide start and end dates for each.

---



---
  
7. Do you take any over-the-counter medications?  Yes       No (skip to item 8)
  - a. If "Yes", please list all your medications here and provide start and end dates for each.

---



---
  
8. In the last 30 days, have you taken or are you currently taking any antibiotics?  Yes       No (skip to item 9)
  - a. If "Yes", please list all your antibiotics here and provide start and end dates for each.

---
  
9. In the last 30 days, have you taken or are you currently taking any anti-fungals?  Yes       No (skip to end)
  - a. If "Yes", please list all your anti-fungals here and provide start and end dates for each.

---

|                                               |             |
|-----------------------------------------------|-------------|
| Initials of person completing the form: _____ | Date: _____ |
|-----------------------------------------------|-------------|

HCL Study – Enrollment Visit  
Hormonal Contraception Form

|                                                     |                              |
|-----------------------------------------------------|------------------------------|
| Date:  __   __  /  __   __  /  __   __ <br>mm dd yy | Site #:  __   __   __        |
| ENRL #:  _E_   __   __   __                         | Visit ID:  __   __   __   __ |
|                                                     | Staff ID:  __   __           |

If she is not starting or currently on HC, please strike through this form.

1. What HC are you starting or currently on?

- Pill, specify \_\_\_\_\_
- Patch, specify \_\_\_\_\_
- Ring, specify \_\_\_\_\_
- Injection, specify \_\_\_\_\_
- Other, specify \_\_\_\_\_

2. If she is starting HC, when will she start it?.....|\_\_| |\_\_| / |\_\_| |\_\_| / |\_\_| |\_\_| (mm/dd/yy)

3. If she is currently on HC, when did she start it?.....|\_\_| |\_\_| / |\_\_| |\_\_| / |\_\_| |\_\_| (mm/dd/yy)

(If she remembers the date, write the date. If she only remembers, the month and year, but not the day, write the 1<sup>st</sup> of the month. If she remembers the year, but not the month or the day, write January 1<sup>st</sup> of the year.)

For current HC users ONLY:

4. If you take the pill, have you ever missed any in the last 6 months?  No  Yes

- a. If yes, what percentage of pills, on average, did you miss in the last 6 months?  
 0-15%     16-30%     31-45%     46-60%     61-85%     86-100%

5. If you wear the patch, have you ever not worn it when you were supposed to in the last 6 months?  No  Yes

- a. If yes, what percentage of the time, on average, did you not wear it in the last 6 months?  
 0-15%     16-30%     31-45%     46-60%     61-85%     86-100%

6. If you wear the ring, have you ever not worn it when you were supposed to in the last 6 months?  No  Yes

- a. If yes, what percentage of the time, on average, did you not wear it in the last 6 months?  
 0-15%     16-30%     31-45%     46-60%     61-85%     86-100%

7. If you receive injections, have you ever missed one in the last 6 months?  No  Yes

- a. If yes, how many, on average, have you missed?  1     2

8. Have you experienced any irregular symptoms, such as bleeding in the last 6 months?  No  Yes

Comments: \_\_\_\_\_  
\_\_\_\_\_  
\_\_\_\_\_

|                                               |             |
|-----------------------------------------------|-------------|
| Initials of person completing the form: _____ | Date: _____ |
|-----------------------------------------------|-------------|



**HCL Study – Enrollment Visit  
Oral Health & Activity Questionnaire**

|                                                                                                     |                              |
|-----------------------------------------------------------------------------------------------------|------------------------------|
| Date:  __   __    /  __   __    /  __   __   <br>mm                      dd                      yy | Site #:  __   __   __        |
| ENRL #:  _E_   __   __   __                                                                         | Visit ID:  __   __   __   __ |
| Staff ID:  __   __                                                                                  |                              |

1. Do you have a dental checkup at least every 2 years?  Yes     No     No answer
2. Have you seen a dentist in the last 6 months?  Yes     No     No answer
3. In the **last 6 months**, how often have you been brushing your teeth?  No answer

|                                              |                                                |
|----------------------------------------------|------------------------------------------------|
| <input type="radio"/> Twice per day or more  | <input type="radio"/> At least once per month  |
| <input type="radio"/> Once per day           | <input type="radio"/> Less than once per month |
| <input type="radio"/> At least once per week | <input type="radio"/> I do not brush my teeth. |
4. In the **last 6 months**, how often have you been flossing your teeth?  No answer

|                                              |                                                |
|----------------------------------------------|------------------------------------------------|
| <input type="radio"/> Twice per day or more  | <input type="radio"/> At least once per month  |
| <input type="radio"/> Once per day           | <input type="radio"/> Less than once per month |
| <input type="radio"/> At least once per week | <input type="radio"/> I do not floss my teeth. |
5. In the **last 6 months**, how often has your gum been bleeding when you brushed/flossed your teeth?  No answer

|                                              |                                                      |                                 |
|----------------------------------------------|------------------------------------------------------|---------------------------------|
| <input type="radio"/> Always                 | <input type="radio"/> Seldom                         | <input type="radio"/> No answer |
| <input type="radio"/> Most of the time       | <input type="radio"/> Never                          |                                 |
| <input type="radio"/> About half of the time | <input type="radio"/> I do not brush/floss my teeth. |                                 |
6. In the **last year**, have you had any toothaches or teeth pulled?  Yes     No     No answer
7. In the **last 2 months**, have you used any of the following? [Specify how many (i.e. 1, 2, 3, etc.) you have used per time frame (i.e. day, wk, mo, etc.)]

|                                       |               |                                             |               |
|---------------------------------------|---------------|---------------------------------------------|---------------|
| <input type="radio"/> Cigarettes      | Specify _____ | <input type="radio"/> Snuff                 | Specify _____ |
| <input type="radio"/> Cigars          | Specify _____ | <input type="radio"/> Other: _____          | Specify _____ |
| <input type="radio"/> Pipe tobacco    | Specify _____ | <input type="radio"/> None (Skip to item 9) |               |
| <input type="radio"/> Chewing tobacco | Specify _____ | <input type="radio"/> No answer             |               |
8. In the **last week**, have you used any of the following? [Specify how many (i.e. 1, 2, 3, etc.) you have used per time frame (i.e. day, wk, mo, etc.)]

|                                       |               |                                    |               |
|---------------------------------------|---------------|------------------------------------|---------------|
| <input type="radio"/> Cigarettes      | Specify _____ | <input type="radio"/> Snuff        | Specify _____ |
| <input type="radio"/> Cigars          | Specify _____ | <input type="radio"/> Other: _____ | Specify _____ |
| <input type="radio"/> Pipe tobacco    | Specify _____ | <input type="radio"/> None         |               |
| <input type="radio"/> Chewing tobacco | Specify _____ | <input type="radio"/> No answer    |               |
9. In the **last 2 months**, have you used any of the following? (Fill in all that applies.)

|                                        |                                                |                                            |
|----------------------------------------|------------------------------------------------|--------------------------------------------|
| <input type="radio"/> Powdered cocaine | <input type="radio"/> Methamphetamine          | <input type="radio"/> Other, specify _____ |
| <input type="radio"/> Crack cocaine    | <input type="radio"/> Marijuana                | <input type="radio"/> None                 |
| <input type="radio"/> Methadone        | <input type="radio"/> Narcotics, specify _____ | <input type="radio"/> No answer            |
10. In the **last week**, how often have you drunk beer, wine or other alcohol?  No answer

|                                                  |                                           |
|--------------------------------------------------|-------------------------------------------|
| <input type="radio"/> About every day (5-7 days) | <input type="radio"/> Once                |
| <input type="radio"/> Several times (2-4 days)   | <input type="radio"/> Never (Skip to end) |

  - a. On the days you drank, how many drinks did you usually have?

|                             |                                 |
|-----------------------------|---------------------------------|
| <input type="radio"/> _____ | <input type="radio"/> No answer |
|-----------------------------|---------------------------------|

|                                               |             |
|-----------------------------------------------|-------------|
| Initials of person completing the form: _____ | Date: _____ |
|-----------------------------------------------|-------------|

Date: |\_\_|\_| / |\_\_|\_| / |\_\_|\_|

ENRL #: |\_E\_|\_|\_|

ENRL

REPROD

HCL Study – Enrollment Visit
Reproductive Health & Activity Questionnaire

For staff only: Site #: |\_\_|\_|\_| Visit ID: |\_\_|\_|\_|\_|\_| Staff ID: |\_\_|\_|\_|

- 1. Date of last menstrual period ...
2. How long was your last menstrual period?
3. How heavy was your last menstrual period?
4. What sanitary protection did you use during your last menstrual period?
5. Did you use tampons at times other than your last menstrual period?
6. Did you use other sanitary protection at times other than your last menstrual period?
7. In the last 2 months, have you had any of these symptoms?
8. In the last 2 months, have you had any of these conditions diagnosed by a clinician?
9. In the last 5 weeks, have you self-treated any vaginal conditions with over-the-counter medications such as Gyne-Lotrimin or Monistat?
10. You would describe your normal vaginal odor as:
11. Have you ever douched? By douching, we mean flushing out your vagina with some fluid.







Date: |\_\_| |\_\_| / |\_\_| |\_\_| / |\_\_| |\_\_|

ENRL #: |\_E\_|\_\_| |\_\_| |\_\_|

ENRL

REPROD

- \*Pill, specify \_\_\_\_\_ >
- \*Patch, specify \_\_\_\_\_ >
- \*Ring, specify \_\_\_\_\_ >
- \*Injection, specify \_\_\_\_\_ >
- \*Implant, specify \_\_\_\_\_ >
- (\*)IUD, specify \_\_\_\_\_ >
- Tubal ligation >
- Partner's vasectomy >
- Condoms for men, specify \_\_\_\_\_ >
- Condoms for women, specify \_\_\_\_\_ >
- Cervical cap >
- Diaphragm w/ jelly or foam, specify \_\_\_\_\_ >
- Diaphragm w/o jelly or foam, specify \_\_\_\_\_ >
- Spermicide, specify \_\_\_\_\_ >
- Douche, specify \_\_\_\_\_ >
- Morning-after pills, specify \_\_\_\_\_ >
- Basal body temperature rhythm >
- Ovulation calendar >
- Withdrawal >
- Abstinence >
- Other, specify \_\_\_\_\_ >
- I am not currently using any birth control method.
- No answer

Start date: \_\_\_\_\_ End date: \_\_\_\_\_

Insertion date: \_\_\_\_\_ Removal date: \_\_\_\_\_

Insertion date: \_\_\_\_\_ Removal date: \_\_\_\_\_

Procedure date: \_\_\_\_\_

Procedure date: \_\_\_\_\_

\_\_\_\_\_ / Start date: \_\_\_\_\_ End date: \_\_\_\_\_

Items 29 and 30 should only be answered if you are using a method of birth control with a \* in front of it.

29. \*Have you used this birth control as prescribed? (If "Yes", you did not miss any pills, you wore your patch or ring when you were supposed to, etc.)  No  Yes (skip to item 30)  No answer

a. If "No", what percentage of pills did you miss, time did you not wear your patch or ring when you were supposed to, etc.?  0-15%  16-30%  31-45%  46-60%  61-85%  86-100%

b. When did this "break" from your birth control start and end? Start date: \_\_\_\_\_ End date: \_\_\_\_\_

30. \*Have you experienced any irregular symptoms in the last 6 months?  No (skip to item 31)  Yes  No answer

If "Yes", please describe: \_\_\_\_\_

\_\_\_\_\_

\_\_\_\_\_

31. How old were you when you started using hormonal birth control? \_\_\_\_\_ years old  I have never used hormonal birth control.  No answer

32. Have you ever been pregnant?  No (skip to end)  Yes  No answer

a. How many live vaginal births have you had, not C-sections?  None  1  2  More than 2  No answer

b. How many live C-sections have you had?  None  1  2  More than 2  No answer

Date: |\_\_|\_\_| / |\_\_|\_\_| / |\_\_|\_\_|

ENRL #: |\_E\_|\_\_|\_\_|\_\_|

**ENRL**

**REPROD**

- c. Have you ever miscarried?  No  Yes  No answer
- d. Have you ever terminated one or more pregnancies?  No  Yes  No answer
- e. When was your last live birth, C-section, miscarriage or termination?  
 |\_\_|\_\_| / |\_\_|\_\_| / |\_\_|\_\_| (mm/dd/yy)  No answer
- 33. Are you currently breastfeeding?  No  Yes  No answer

Initials of person completing the form: \_\_\_\_\_ Date: \_\_\_\_\_

Date: |\_\_|\_| / |\_\_|\_| / |\_\_|\_|

ENRL #: |\_E\_|\_|\_|

ENRL

CLINICAL

HCL Study – Enrollment Visit  
Clinical Exam & Evaluation Form

For staff only: Site #: |\_\_|\_|\_| Visit ID: |\_\_|\_|\_|\_|\_| Staff ID: |\_\_|\_|\_|

- 1. HEIGHT > |\_\_|\_| in (  Skipped)
- 2. WEIGHT > |\_\_|\_|\_| lb (  Skipped)
- 3. BP > |\_\_|\_|\_| / |\_\_|\_|\_| mm Hg (  Skipped)
- 4. SCLERA (  Skipped)
  - White  Icteric  Other, specify\_\_\_\_\_
- 5. ORAL EXAM (  Skipped)
  - Normal  Decay
  - Sore(s)  Other, specify\_\_\_\_\_
  - Gingivitis
- 6. NEUROLOGICAL EXAM (  Skipped)
  - Focal  Non-focal  Other, specify\_\_\_\_\_
- 7. CARDIOVASCULAR EXAM (  Skipped)
  - Regular  Murmur  Other, specify\_\_\_\_\_
- 8. PULMONARY EXAM (  Skipped)
  - Normal  Abnormal, describe\_\_\_\_\_
- 9. BREAST EXAM (  Skipped)
  - Normal  Fibrocystic  Mass, describe\_\_\_\_\_
- 10. ABDOMINAL EXAM (  Skipped)
  - Normal  CVA
  - Tenderness  Mass, describe\_\_\_\_\_
  - Rebound  Other, specify\_\_\_\_\_
- 11. EXTREMITIES (  Skipped)
  - Normal  Edematous  Other, specify\_\_\_\_\_
- 12. SKIN (  Skipped)
  - Normal  Rash, describe\_\_\_\_\_
  - P&P rash  Molluscum
  - Folliculitis  Scabies
  - Intertrigo  Other, specify\_\_\_\_\_
- 13. PUBIC HAIR (  Skipped)
  - Normal  Crabs  Other, specify\_\_\_\_\_
- 14. INGUINAL NODES (  Skipped)
  - Normal  Enlarged & tender
  - Enlarged  Bilateral
  - Tender  Unilateral

Date: |\_\_|\_| / |\_\_|\_| / |\_\_|\_|

ENRL #: |\_E\_|\_|\_|

**ENRL**

**CLINICAL**

**15. VULVA/VAGINA**

( Skipped)

- Normal
- Bartholin cyst
- Edema
- Erythema
- Excoriations
- Rash
- Ulcer
- Vesicle
- Other, specify \_\_\_\_\_

**16. Did the patient complain of any vaginal symptoms?**

( Skipped)

- No
- Yes >
  - Discharge
  - Irritation
  - Itching
  - Burning
  - Foul odor
  - Other, specify \_\_\_\_\_

**17. VAGINAL DISCHARGE**

( Skipped)

- No
- Yes >
  - Location:**
    - Vaginal walls +/- fornix
    - Fornix, anterior
    - Fornix, posterior
    - Fornix, both anterior and posterior
  - Consistency:**
    - Homogenous (smooth)
    - Inhomogenous (clumpy)
  - Color:**
    - Clear
    - White/cream/gray
    - Yellow/green
    - Bloody
    - Other, specify \_\_\_\_\_
  - Character:**
    - Thin, flows
    - Thick, does not flow
    - Other, specify \_\_\_\_\_
  - Quantity:**
    - Scant (little on speculum)
    - Moderate (speculum <1/2 full)
    - Large (speculum >1/2 full)

**18. CERVIX**

( Skipped)

- Normal
- Cervical discharge >
  - Clear
  - Cloudy white
  - Yellow/green
  - Bloody
  - No answer
- Ulcer
- Vesicle
- Friability >
  - Mild (blood spots)
  - Moderate (soaked with blood)
- Fundal tenderness
- Ectopic zone >
  - <25%
  - 26-50
  - 51-75
  - >75

**19. BIMANUAL EXAM**

( Skipped)

- Adnexal:**
  - Tenderness >
    - Right
    - Left
    - Bilateral
    - N/A
  - Fullness >
    - Right
    - Left
    - Bilateral
    - N/A
  - Mass >
    - Right
    - Left
    - Bilateral
    - N/A
- Fundal:**
  - Cervical tenderness >
    - No
    - Yes
  - Uterine enlargement >
    - No
    - Yes
  - Mass/fibroids >
    - No
    - Yes

**20. RECTUM**

( Skipped)

- Normal
- Discharge
- Fissure
- Hemorrhoids
- Ulcer
- Warts
- Other, specify \_\_\_\_\_

Date: |\_\_|\_| / |\_\_|\_| / |\_\_|\_|

ENRL #: |\_E\_|\_|\_|

ENRL

CLINICAL

21. AMSEL CRITERIA

- Vaginal pH >  4.0  4.4  4.7  5.0  5.3  5.5  5.8  6.1  6.5  7.0 ( Skipped)

---

- WHIFF test >  Negative  Positive ( Skipped)

---

- Homogenous discharge >  No  Yes ( Skipped)

---

- Clue cells >  No  Yes ( Skipped)

22. DIAGNOSIS

- BV, asymptomatic  MPC  Genital warts
  - BV symptomatic  PID  Yeast
  - Gonorrhoea  Syphilis  Other, specify \_\_\_\_\_
  - Herpes  Trichomonas  None
- ( Skipped)

22. What medication(s) was prescribed?

- Metronidazole, 500 mg bid x 7 days
  - Metronidazole, 2 g orally, at once
  - Metronidazole gel 0.75%, one full applicator (5 g) intravaginally, qd x 5 days
  - Clindamycin cream 2%, one full applicator (5 g) intravaginally, at bedtime x 7 days
  - Anti-fungal topical cream, specify \_\_\_\_\_
  - Fluconazole, 150 mg orally
  - Other, specify \_\_\_\_\_
  - None
- ( Skipped)

23. SPECIMENS (Fill in all collected.)

- 30 ml blood  Copan vaginal swab 2  endocervical brush
- 5 ml saliva  Starplex vaginal swab  Copan rectal swab
- Urine  dacron vaginal swab  vaginal smear
- GenProbe vaginal swab  dacron ectocervical swab  Pap smear
- Copan vaginal swab 1  dacron endocervical swab  None

24. REAL-TIME PREGNANCY TESTING

- No
- Yes > Performed by...  the OB/GYN clinic  the study team
- > Result is...  Negative  Positive

25. REAL-TIME STD TESTING

- No
- Yes > Performed by...  the OB/GYN clinic  the study team
- > Testing for...
  - Gonorrhoea
  - Mycoplasma
  - Genital warts (HPV)
  - Chlamydia
  - Syphilis
  - Other, specify \_\_\_\_\_
  - Trichomonas
  - Herpes
- > Result is...  Negative  Positive, specify \_\_\_\_\_

26. REAL-TIME HIV TESTING

- No
- Yes > Performed by...  the OB/GYN clinic  the study team
- > Result is...  Negative  Positive

Initials of person completing the form: \_\_\_\_\_ Date: \_\_\_\_\_
